# Supplementary material
Source: ML conference proceedings conference paper supplement (https://openreview.net/forum?id=tH8Q2TRSZf)
Supplement: supplementary_material [file Bilateral_Trade__the_Return_of_the_Broker-4.pdf › Bilateral_Trade__the_Return_of_the_Broker-4.pdf]

## 414 Appendix

415 In order to prove Lemma 2, we need to introduce some auxiliary useful lemmas.

416 **Lemma 5.** *It holds  $\mathbb{P}[\mathcal{E}_1] \geq 1 - \delta$ .*

417 *Proof.* Let  $s \geq H$  be an integer, and let  $k \in \mathcal{K}$ . By the Chernoff bound and the fact that the variables  
418 are all i.i.d., we have:

$$\begin{aligned} \mathbb{P} \left[ \sum_{i=1}^s \mathbb{I}\{B_{k,i} \geq p_k\} \leq \frac{s}{2} \mathbb{P}[B \geq p_k] \right] &\leq e^{-\frac{s\mathbb{P}[B \geq p_k]}{8}} \\ &= e^{-\frac{s\mathbb{P}[B \geq p_k] \log(KT^2/\delta)}{8 \log(KT^2/\delta)}} \\ &= \left( \frac{\delta}{KT^2} \right)^{\frac{s\mathbb{P}[B \geq p_k]}{8 \log(KT^2/\delta)}} \\ &\leq \left( \frac{\delta}{KT^2} \right)^{\frac{T^{1/3}\mathbb{P}[B \geq p_k]}{8 \log(KT^2/\delta)}} \leq \frac{\delta}{KT^2}. \end{aligned}$$

419 If  $t \geq HK$ , then  $\mathcal{T}_{k,t} \geq H$  according to the definition of  $\mathcal{T}_{k,t}$  and how our algorithm works. It  
420 follows that

$$\begin{aligned} &\mathbb{P} \left[ \bigcup_{t=HK}^T \bigcup_{k \in \mathcal{K}} \left\{ \mathcal{Q}_{k,t} \leq \frac{\mathcal{T}_{k,t}}{2} \mathbb{P}[B \geq p_k] \right\} \right] \\ &= \mathbb{P} \left[ \bigcup_{s=H}^T \bigcup_{t=HK}^T \bigcup_{k \in \mathcal{K}} \left\{ \mathcal{Q}_{k,t} \leq \frac{\mathcal{T}_{k,t}}{2} \mathbb{P}[B \geq p_k] \right\} \cap \{\mathcal{T}_{k,t} = s\} \right] \\ &\leq \sum_{s=H}^T \sum_{t=HK}^T \sum_{k \in \mathcal{K}} \mathbb{P} \left[ \left\{ \mathcal{Q}_{k,t} \leq \frac{\mathcal{T}_{k,t}}{2} \mathbb{P}[B \geq p_k] \right\} \cap \{\mathcal{T}_{k,t} = s\} \right] \\ &= \sum_{s=H}^T \sum_{t=HK}^T \sum_{k \in \mathcal{K}} \mathbb{P} \left[ \left\{ \sum_{i=1}^s \mathbb{I}\{B_{k,i} \geq p_k\} \leq \frac{s}{2} \mathbb{P}[B \geq p_k] \right\} \cap \{\mathcal{T}_{k,t} = s\} \right] \\ &\leq \sum_{s=H}^T \sum_{t=HK}^T \sum_{k \in \mathcal{K}} \mathbb{P} \left[ \sum_{i=1}^s \mathbb{I}\{B_{k,i} \geq p_k\} \leq \frac{s}{2} \mathbb{P}[B \geq p_k] \right] \\ &\leq \delta. \end{aligned}$$

421 Hence,

$$\mathbb{P} \left[ \bigcap_{t=HK}^T \bigcap_{k \in \mathcal{K}} \left\{ \mathcal{Q}_{k,t} > \frac{\mathcal{T}_{k,t}}{2} \mathbb{P}[B \geq p_k] \right\} \right] \geq 1 - \delta,$$

422 which concludes the proof.  $\square$

**Lemma 6.** *It holds*

$$\mathbb{P} \left[ \bigcap_{k \in \mathcal{K}} \left\{ \left| \hat{G}_k - \int_0^{p_k} \mathbb{P}[S \leq \lambda] d\lambda \right| \leq \sqrt{\frac{2 \log(2/\delta)}{KN_k}} + \frac{1}{K} \right\} \right] \geq 1 - 2K\delta.$$

*Proof.* Under the event  $\mathcal{E}_1$ , for all  $i \in [K]$  such that  $\mathbb{P}[B \geq p_i] \geq 8T^{-\frac{1}{3}} \log(KT^2/\delta)$ , we have:

$$\mathcal{Q}_{i,HK} \geq \frac{1}{2} \mathcal{T}_{i,HK} \mathbb{P}[B \geq p_i] = \frac{1}{2} H \mathbb{P}[B \geq p_i],$$

423 since  $\mathcal{T}_{i,HK} = H$  for every  $i \in [K]$ , according how our algorithm works. This implies that, under  
 424 the event  $\mathcal{E}_1$ , the following holds:

$$N_k = \min_{i \leq k} \mathcal{Q}_{i,HK} \geq \frac{1}{2} \min_{i \leq k} H \mathbb{P}[B \geq p_i] = \frac{1}{2} H \mathbb{P}[B \geq p_k] := n_k.$$

425 As a first step, we prove that, conditioned to the event  $\{N_k = \ell\} \cap \mathcal{E}_1$ , the estimates  $\hat{G}_k$  concentrate  
 426 around their expectation. Specifically, whenever  $\ell \geq n_k$ , the following holds:

$$\mathbb{P} \left[ \left| \hat{G}_k - \mathbb{E}[\hat{G}_k] \right| \leq 2 \sqrt{\frac{\log(2/\delta)}{K\ell}} \mid \{N_k = \ell\} \cap \mathcal{E}_1 \right] \geq 1 - \delta. \quad (4)$$

427 Indeed, by Azuma–Hoeffding inequality, we have:

$$\mathbb{P} \left[ \left| \sum_{i=1}^k \sum_{j=1}^{\ell} \mathbb{I}\{S_{i,j} \leq p_i\} - \sum_{i=1}^k \sum_{j=1}^{\ell} \mathbb{P}[S \leq p_i] \right| \leq \sqrt{2K\ell \log(2/\delta)} \right] \geq 1 - \delta.$$

428 Furthermore, noticing that

$$\left| \hat{G}_k - \mathbb{E}[\hat{G}_k] \right| = \frac{1}{K\ell} \left| \sum_{i=1}^k \sum_{j=1}^{\ell} \mathbb{I}\{S_{i,j} \leq p_i\} - \sum_{i=1}^k \sum_{j=1}^{\ell} \mathbb{P}[S \leq p_i] \right|,$$

429 and that  $\{N_k = \ell\} \cap \mathcal{E}_1$  is  $\mathbb{P}$ -independent from  $S_1, S_2, \dots$ , we have:

$$\begin{aligned} \mathbb{P} \left[ \left| \hat{G}_k - \mathbb{E}[\hat{G}_k] \right| \leq \sqrt{\frac{2 \log(2/\delta)}{K\ell}} \mid \{N_k = \ell\} \cap \mathcal{E}_1 \right] &= \mathbb{P} \left[ \left| \hat{G}_k - \mathbb{E}[\hat{G}_k] \right| \leq \sqrt{\frac{2 \log(2/\delta)}{K\ell}} \right] \\ &\geq 1 - \delta, \end{aligned}$$

430 showing that Equation 4 holds. Therefore, we can prove that:

$$\begin{aligned} &\mathbb{P} \left[ \left| \hat{G}_k - \mathbb{E}[\hat{G}_k] \right| \leq \sqrt{\frac{2 \log(2/\delta)}{K N_k}} \mid \mathcal{E}_1 \right] \\ &\geq \sum_{\substack{\ell=0, \\ \ell \geq n_k}}^H \mathbb{P} \left[ \left| \hat{G}_k - \mathbb{E}[\hat{G}_k] \right| \leq \sqrt{\frac{2 \log(2/\delta)}{K\ell}} \mid \{N_k = \ell\} \cap \mathcal{E}_1 \right] \mathbb{P}[N_k = \ell \mid \mathcal{E}_1] \\ &\geq \sum_{\substack{\ell=0, \\ \ell \geq n_k}}^H (1 - \delta) \mathbb{P}[N_k = \ell \mid \mathcal{E}_1] \\ &= 1 - \delta, \end{aligned}$$

431 where the first inequality holds because of the law of total probability, noticing that  $\mathbb{P}[N_k = \ell \mid \mathcal{E}_1] =$   
 432 0 for all  $\ell < n_k$ , while the second inequality by eq. (4). Thanks to the i.i.d. hypothesis we have:

$$\begin{aligned} \mathbb{E}[\hat{G}_k] - \int_0^{p_k} \mathbb{P}[S \leq \lambda] d\lambda &= \mathbb{E} \left[ \frac{1}{K N_k} \sum_{i=1}^k \sum_{j=1}^{N_k} \mathbb{I}\{S_{i,j} \leq p_i\} \right] - \int_0^{p_k} \mathbb{P}[S \leq \lambda] d\lambda \\ &= \frac{1}{K} \sum_{i=1}^k \mathbb{P}[S \leq p_i] - \int_0^{p_k} \mathbb{P}[S \leq \lambda] d\lambda \\ &= \sum_{i=1}^k \int_{\frac{i-1}{K}}^{\frac{i}{K}} \left( \mathbb{P} \left[ S \leq \frac{i}{K} \right] - \mathbb{P}[S \leq \lambda] \right) d\lambda =: (\star), \end{aligned}$$

433 Now, due to the fact that  $\lambda \mapsto \mathbb{P}[S \leq \lambda]$  is a non-decreasing function, we have that

$$0 \leq (\star) \leq \sum_{i=1}^k \int_{\frac{i-1}{K}}^{\frac{i}{K}} \left( \mathbb{P} \left[ S \leq \frac{i}{K} \right] - \mathbb{P} \left[ S \leq \frac{i-1}{K} \right] \right) d\lambda$$

$$= \frac{1}{K} \sum_{i=1}^k \left( \mathbb{P} \left[ S \leq \frac{i}{K} \right] - \mathbb{P} \left[ S \leq \frac{i-1}{K} \right] \right) = \frac{\mathbb{P}[S \leq p_k] - \mathbb{P}[S \leq 0]}{K} \leq \frac{1}{K}.$$

434 Thus, the following holds:

$$\mathbb{P} \left[ \left| \hat{G}_k - \int_0^{p_k} \mathbb{P}[S \leq \lambda] d\lambda \right| \leq \sqrt{\frac{2 \log(2/\delta)}{K N_k}} + \frac{1}{K} \mid \mathcal{E}_1 \right] \geq 1 - \delta.$$

435 Thus, thanks to Lemma 5 we have:

$$\begin{aligned} & \mathbb{P} \left[ \left| \hat{G}_k - \int_0^{p_k} \mathbb{P}[S \leq \lambda] d\lambda \right| \leq \sqrt{\frac{2 \log(2/\delta)}{K N_k}} + \frac{1}{K} \right] \\ & \geq \mathbb{P} \left[ \left| \hat{G}_k - \int_0^{p_k} \mathbb{P}[S \leq \lambda] d\lambda \right| \leq \sqrt{\frac{2 \log(2/\delta)}{K N_k}} + \frac{1}{K} \mid \mathcal{E}_1 \right] \mathbb{P}[\mathcal{E}_1] \\ & \geq 1 - 2\delta. \end{aligned}$$

436 Finally, taking a union bound over all possible sets of arms  $\mathcal{K}$ , we prove the lemma.  $\square$

**Lemma 7.** *It holds*

$$\mathbb{P} \left[ \bigcap_{k \in \mathcal{K}} \left\{ \left| \hat{F}_k - \int_{p_k}^1 \mathbb{P}[B \geq \lambda] d\lambda \right| \leq \sqrt{\frac{2 \log(2/\delta)}{K H}} + \frac{1}{K} \right\} \right] \geq 1 - K\delta.$$

437 *Proof.* Thanks to the i.i.d. hypothesis and the fact that  $\lambda \mapsto \mathbb{P}[B \geq \lambda]$  is a non-increasing function,  
438 with an argument analogous to that provided in the proof of Lemma 6 we have that

$$\left| \mathbb{E}[\hat{F}_k] - \int_{p_k}^1 \mathbb{P}[B \geq \lambda] d\lambda \right| \leq \frac{1}{K}.$$

439 By Azuma–Hoeffding inequality, we have:

$$\left| \sum_{i=1}^k \sum_{j=1}^H \mathbb{I}\{B_{i,j} \geq p_i\} - \sum_{i=1}^k \sum_{j=1}^H \mathbb{P}[B \geq p_i] \right| \leq \sqrt{2kH \log(2/\delta)} \leq \sqrt{2KH \log(2/\delta)}$$

440 with probability  $1 - \delta$ . Hence, to conclude, it is enough to notice that

$$\left| \hat{F}_k - \mathbb{E}[\hat{F}_k] \right| = \frac{1}{KH} \left| \sum_{i=1}^k \sum_{j=1}^H \mathbb{I}\{B_{i,j} \geq p_i\} - \sum_{i=1}^k \sum_{j=1}^H \mathbb{P}[B \geq p_i] \right|$$

441 and take a union bound over all possible sets of arms  $[K]$ .  $\square$

442 **Lemma 8.** *It holds  $\mathbb{P}[\mathcal{E}_3] \geq 1 - 2KT\delta$ .*

443 *Proof.* Fix  $k \in \mathcal{K}$  and  $t \geq HK$ . Recall that, by definition,

$$\hat{\mu}_{k,t} := \frac{\sum_{\tau=1}^{\mathcal{Q}_{k,t}} \mathbb{I}\{S_{k,\tau} \leq p_k\}}{\mathcal{Q}_{k,t}}.$$

444 Employing a union bound and the Hoeffding inequality, we have that:

$$\hat{\mu}_{k,t} - \sqrt{\frac{\log(2T/\delta)}{2\mathcal{Q}_{k,t}}} \leq \mathbb{P}[S \leq p_k] \leq \hat{\mu}_{k,t} + \sqrt{\frac{\log(2T/\delta)}{2\mathcal{Q}_{k,t}}}$$

445 with probability at least  $1 - \delta$ . Thus, taking a union bound, we have:

$$\mathbb{P} \left[ \bigcap_{k \in [K]} \bigcap_{t=HK}^T \left\{ \hat{\mu}_{k,t} - \sqrt{\frac{\log(2T/\delta)}{2\mathcal{Q}_{k,t}}} \leq \mathbb{P}[S \leq p_k] \leq \hat{\mu}_{k,t} + \sqrt{\frac{\log(2T/\delta)}{2\mathcal{Q}_{k,t}}} \right\} \right] \geq 1 - KT\delta.$$

446 With an analogous argument, it is possible to show that:

$$\mathbb{P} \left[ \bigcap_{k \in [K]} \bigcap_{t=HK}^T \left\{ \hat{\nu}_{k,t} - \sqrt{\frac{\log(2T/\delta)}{2\mathcal{T}_{k,t}}} \leq \mathbb{P}[B \geq p_k] \leq \hat{\nu}_{k,t} + \sqrt{\frac{\log(2T/\delta)}{2\mathcal{T}_{k,t}}} \right\} \right] \geq 1 - KT\delta.$$

447 Thus, taking a union bound, we have that the lemma holds.  $\square$

448 **Lemma 9.** *It holds  $\mathbb{P}[\mathcal{E}_4] \geq 1 - \delta$*

449 *Proof.* Let  $\epsilon = 8T^{-1/3} \log(KT^2/\delta)$  and  $\hat{\nu}_k := \hat{\nu}_{k, HK}$ . If  $k \notin \mathcal{K}$ , then  $\mathbb{P}[B \geq p_k] \leq \epsilon$ . Therefore, we  
 450 can employ the multiplicative Chernoff inequality as follows:

$$\mathbb{P}[\hat{\nu}_k \geq (1+c)\mathbb{P}[B \geq p_k]] \leq e^{-\frac{c^2 H \mathbb{P}[B \geq p_k]}{2+c}},$$

451 with  $c = \frac{\epsilon}{\mathbb{P}[B \geq p_k]}$ . Thus, we get:

$$\begin{aligned} \mathbb{P}[\hat{\nu}_k \geq \mathbb{P}[B \geq p_k] + \epsilon] &\leq \exp \left( -\frac{\left( \frac{\epsilon}{\mathbb{P}[B \geq p_k]} \right)^2 H \mathbb{P}[B \geq p_k]}{2 + \frac{\epsilon}{\mathbb{P}[B \geq p_k]}} \right) \\ &\leq \exp \left( -\frac{\frac{\epsilon}{\mathbb{P}[B \geq p_k]}}{2 + \frac{\epsilon}{\mathbb{P}[B \geq p_k]}} \cdot \epsilon H \right) \\ &\leq \left( \frac{\delta}{KT^2} \right)^{8/3} \leq \frac{\delta}{KT^2}, \end{aligned}$$

452 since  $x/(x+2) \geq 1/3$ , for every  $x \geq 1$ . As a result, we have:

$$\mathbb{P}[\mathcal{Q}_{k, HK} \leq 2H\epsilon] = \mathbb{P}[\hat{\nu}_k \leq 2\epsilon] \geq \mathbb{P}[\hat{\nu}_k \leq \mathbb{P}[B \geq p_k] + \epsilon] \geq 1 - \frac{\delta}{KT^2},$$

453 recalling that  $\hat{\nu}_{k, HK} = \mathcal{Q}_{k, HK}/H$ . Furthermore, we notice that:

$$2H\epsilon \leq 16HT^{-1/3} \log(KT^2/\delta) = 16 \frac{\lceil T^{1/3} \rceil}{T^{1/3}} \log(KT^2/\delta) \leq 32 \log(KT^2/\delta).$$

454 Thus, by taking a union bound, we have:

$$\mathbb{P} \left[ \bigcap_{k \notin \mathcal{K}} \{ \mathcal{Q}_{k, HK} \leq 32 \log(KT^2/\delta) \} \right] \geq 1 - \frac{\delta}{T^2} \geq 1 - \delta,$$

455 concluding the proof.  $\square$

**Lemma 2.** *Let  $\mathcal{E} := \mathcal{E}_1 \cap \mathcal{E}_2 \cap \mathcal{E}_3 \cap \mathcal{E}_4$ . Then, we have:*

$$\mathbb{P}[\mathcal{E}] \geq 1 - \mathcal{O}(KT\delta).$$

456 *Proof.* Thanks to Lemmas [5](#), [6](#), [7](#), [8](#) and [9](#) by taking a union bound we have:

$$\mathbb{P}[\mathcal{E}] \geq 1 - (5KT + 2)\delta = 1 - \mathcal{O}(KT\delta),$$

457 concluding the proof.  $\square$

458 **Lemma 3.** *Let  $k \in \mathcal{K}$ . Then, for each  $t > HK$ , conditional on the event  $\mathcal{E}$ , we have:*

$$0 \leq \left( \hat{\mu}_{k,t} + \sqrt{\frac{\log(2T/\delta)}{2\mathcal{Q}_{k,t}}} \right) \left( \hat{F}_k + \sqrt{\frac{2\log(2/\delta)}{HK}} + \frac{1}{K} \right) - \mathbb{P}[S \leq p_k] \int_{p_k}^1 \mathbb{P}[B \geq \lambda] d\lambda \leq \eta,$$

459 where  $\eta := C \log \left( \frac{T}{\delta} \right) \left( \frac{1}{T^{1/3}} + \frac{1}{\sqrt{\mathcal{T}_{k,t}}} \right)$  and  $C > 0$  is an absolute constant.

460 *Proof.* We first prove that:

$$\left( \hat{\mu}_{k,t} + \sqrt{\frac{\log(2T/\delta)}{2\mathcal{Q}_{k,t}}} \right) \left( \hat{F}_k + \sqrt{\frac{2\log(2/\delta)}{HK}} + \frac{1}{K} \right)$$

461 is the (optimistic) estimator of

$$\mathbb{P}[S \leq p_k] \int_{p_k}^1 \mathbb{P}[B \geq \lambda] d\lambda.$$

462 To do so, we observe that under the event  $\mathcal{E}$ , we have:

$$\begin{aligned} & \left( \hat{\mu}_{k,t} + \sqrt{\frac{\log(2T/\delta)}{2\mathcal{Q}_{k,t}}} \right) \left( \hat{F}_k + \sqrt{\frac{2\log(2/\delta)}{HK}} + \frac{1}{K} \right) - \mathbb{P}[S \leq p_k] \int_{p_k}^1 \mathbb{P}[B \geq \lambda] d\lambda \\ & \leq \left( \mathbb{P}[S \leq p_k] + \sqrt{\frac{2\log(2T/\delta)}{\mathcal{Q}_{k,t}}} \right) \left( \int_{p_k}^1 \mathbb{P}[B \geq \lambda] d\lambda + \sqrt{\frac{8\log(2/\delta)}{HK}} + \frac{2}{K} \right) \\ & \quad - \mathbb{P}[S \leq p_k] \int_{p_k}^1 \mathbb{P}[B \geq \lambda] d\lambda \\ & \leq \sqrt{\frac{2\log(2T/\delta)}{\mathcal{Q}_{k,t}}} \int_{p_k}^1 \mathbb{P}[B \geq \lambda] d\lambda + \mathbb{P}[S \leq p_k] \sqrt{\frac{8\log(2/\delta)}{HK}} + \frac{4\log(2T/\delta)}{\sqrt{HK\mathcal{Q}_{k,t}}} \\ & \quad + \frac{2}{K} \left( \mathbb{P}[S \leq p_k] + \sqrt{\frac{2\log(2T/\delta)}{\mathcal{Q}_{k,t}}} \right) \\ & \leq \underbrace{\sqrt{\frac{2\log(2T/\delta)}{\mathcal{Q}_{k,t}}} \mathbb{P}[B \geq p_k]}_{(\star)} + \frac{20\log(2T/\delta)}{T^{1/3}}. \end{aligned}$$

463 Now, notice that, since  $k \in \mathcal{K}$  by assumption, we have  $\mathcal{Q}_{k,t} \geq \frac{1}{2}\mathcal{T}_{k,t}\mathbb{P}[B \geq p_k]$  for all  $t > HK$ ,  
464 under the event  $\mathcal{E}$ . Therefore, the following holds:

$$(\star) = \sqrt{\frac{2\log(2T/\delta)}{\mathcal{Q}_{k,t}}} \mathbb{P}[B \geq p_k] \leq \sqrt{\frac{4\log(2T/\delta)}{\mathcal{T}_{k,t}\mathbb{P}[B \geq p_k]}} \mathbb{P}[B \geq p_k] \leq 2 \frac{\log(2T/\delta)}{\sqrt{\mathcal{T}_{k,t}}}.$$

465 Putting all together, we have:

$$\begin{aligned} & \left( \hat{\mu}_{k,t} + \sqrt{\frac{\log(2T/\delta)}{2\mathcal{Q}_{k,t}}} \right) \left( \hat{F}_k + \sqrt{\frac{2\log(2/\delta)}{HK}} + \frac{1}{K} \right) - \mathbb{P}[S \leq p_k] \int_{p_k}^1 \mathbb{P}[B \geq \lambda] d\lambda \\ & \leq \log\left(\frac{T}{\delta}\right) \mathcal{O}\left(\sqrt{\mathcal{T}_{k,t}} + \frac{1}{T^{\frac{1}{3}}}\right). \end{aligned}$$

466 Finally, we notice that:

$$\mathbb{P}[S \leq p_k] \int_{p_k}^1 \mathbb{P}[B \geq \lambda] d\lambda \leq \left( \hat{\mu}_{k,t} + \sqrt{\frac{\log(2T/\delta)}{2\mathcal{Q}_{k,t}}} \right) \left( \hat{F}_k + \sqrt{\frac{2\log(2/\delta)}{HK}} + \frac{1}{K} \right),$$

467 as a direct consequence of being under the clean event  $\mathcal{E}$ . This concludes the proof.  $\square$

468 **Lemma 4.** Let  $k \in \mathcal{K}$ . Then, for each  $t > HK$ , conditional on the event  $\mathcal{E}$ , we have:

$$0 \leq \left( \hat{\nu}_{k,t} + \sqrt{\frac{\log(2T/\delta)}{2\mathcal{T}_{k,t}}} \right) \left( \hat{G}_k + \sqrt{\frac{2\log(2/\delta)}{KN_k}} + \frac{1}{K} \right) - \mathbb{P}[B \geq p_k] \int_0^{p_k} \mathbb{P}[S \leq \lambda] d\lambda \leq \eta,$$

469 where  $\eta := C \log\left(\frac{T}{\delta}\right) \left( \frac{1}{T^{1/3}} + \frac{1}{\sqrt{\mathcal{T}_{k,t}}} \right)$  and  $C > 0$  is an absolute constant.

470 *Proof.* Notice that the first inequality is trivially given by the fact that, under the event  $\mathcal{E}$ , the quantity

$$\left( \hat{\nu}_{k,t} + \sqrt{\frac{\log(2T/\delta)}{2\mathcal{T}_{k,t}}} \right) \left( \hat{G}_k + \sqrt{\frac{2\log(2/\delta)}{KN_k}} + \frac{1}{K} \right)$$

471 is an (optimistic) estimator of

$$\mathbb{P}[B \geq p_k] \int_0^{p_k} \mathbb{P}[S \leq \lambda] d\lambda.$$

472 For the second inequality, we notice that, under the event  $\mathcal{E}$ :

$$\begin{aligned} & \left( \hat{\nu}_{k,t} + \sqrt{\frac{\log(2T/\delta)}{2\mathcal{T}_{k,t}}} \right) \left( \hat{G}_k + \sqrt{\frac{2\log(2/\delta)}{KN_k}} + \frac{1}{K} \right) - \mathbb{P}[B \geq p_k] \int_0^{p_k} \mathbb{P}[S \leq \lambda] d\lambda \\ & \stackrel{\mathcal{E} \subset \mathcal{E}_2 \cap \mathcal{E}_3}{\leq} \left( \mathbb{P}[B \geq p_k] + \sqrt{\frac{2\log(2T/\delta)}{\mathcal{T}_{k,t}}} \right) \left( \int_0^{p_k} \mathbb{P}[S \leq \lambda] d\lambda + \sqrt{\frac{8\log(2/\delta)}{KN_k}} + \frac{2}{K} \right) \\ & \quad - \mathbb{P}[B \geq p_k] \int_0^{p_k} \mathbb{P}[S \leq \lambda] d\lambda \\ & \stackrel{\mathcal{E} \subset \mathcal{E}_1}{\leq} \sqrt{\frac{2\log(2T/\delta)}{\mathcal{T}_{k,t}}} \int_0^{p_k} \mathbb{P}[S \leq \lambda] d\lambda + 4\mathbb{P}[B \geq p_k] \sqrt{\frac{\log(2/\delta)}{KH\mathbb{P}[B \geq p_k]}} \\ & \quad + \frac{4\sqrt{2}\log(2T/\delta)}{\sqrt{KH\mathbb{P}[B \geq p_k]}\sqrt{\mathcal{T}_{k,t}}} + \frac{2}{K} \left( \mathbb{P}[B \geq p_k] + \sqrt{\frac{2\log(2T/\delta)}{\mathcal{T}_{k,t}}} \right) \\ & \stackrel{k \in \mathcal{K}}{=} \log\left(\frac{T}{\delta}\right) \cdot \mathcal{O}\left(\sqrt{\mathcal{T}_{k,t}} + \frac{1}{T^{\frac{1}{3}}}\right), \end{aligned}$$

473 concluding the proof. □

474 **Theorem 1.** Algorithm 2 guarantees regret  $R_T = \tilde{\mathcal{O}}(T^{2/3})$ .

475 *Proof.* We first notice that, by defining

$$\mathcal{R}_T := \sum_{t=1}^T g(p^*) - \sum_{t=1}^T g(P_t),$$

476 we have that  $R_T = \mathbb{E}[\mathcal{R}_T]$  and

$$\begin{aligned} R_T &= \mathbb{E}[\mathcal{R}_T \mathbb{I}_{\mathcal{E}}] + \mathbb{E}[\mathcal{R}_T \mathbb{I}_{\mathcal{E}^c}] \\ &\leq \mathbb{E}[\mathcal{R}_T \mathbb{I}_{\mathcal{E}}] + \mathbb{E}[T \mathbb{I}_{\mathcal{E}^c}] \\ &\leq \mathbb{E}[\mathcal{R}_T \mathbb{I}_{\mathcal{E}}] + 6KT^2\delta = \mathbb{E}[\mathcal{R}_T \mathbb{I}_{\mathcal{E}}] + \mathcal{O}(T^{1/3}). \end{aligned}$$

477 It is then sufficient to control the magnitude of  $\mathcal{R}_T$  under the clean event  $\mathcal{E}$ . Hence, from this point  
478 on, we assume we are under the clean event  $\mathcal{E}$ .

479 Let  $k^* \in \arg \max_{k \in [K]} g(p_k)$ .

480 First, notice that, if  $\mathbb{P}[p_{k^*} \leq B] \leq 64T^{-1/3} \log(KT^2/\delta)$ , then the decomposition in eq. (1) leads to

$$\begin{aligned} g(p_{k^*}) &\leq \mathbb{P}[S \leq p_k] \cdot (1-p) \cdot \mathbb{P}[B \geq p_k] + \mathbb{P}[B \geq p_k] \cdot p \cdot \mathbb{P}[S \leq p_k] \\ &\leq \mathbb{P}[B \geq p_k] \leq 64T^{-1/3} \log(KT^2/\delta) = \tilde{\mathcal{O}}(T^{-1/3}). \end{aligned}$$

481 Thus, when  $\mathbb{P}[p_{k^*} \leq B] \leq 64T^{-1/3} \log(KT^2/\delta)$ , we have, due to Lemma 1, that if we pay an  
482 additional term whose instantaneous regret is upper bounded by  $L/K$ , we can control  $\mathcal{R}_T$  by  
483 comparing our performance against the performance of the best point in the grid  $p_{k^*}$ . This leads to:

$$\mathcal{R}_T = T \cdot \tilde{\mathcal{O}}(T^{-1/3}) + \frac{TL}{K} = \tilde{\mathcal{O}}(T^{2/3}).$$

Hence, we are left to analyze what happens when  $\mathbb{P}[p_{k^*} \leq B] > 64T^{-1/3} \log(KT^2/\delta)$ , which we assume being the case from this point on. First, since  $\mathbb{P}[p_{k^*} \leq B] > 64T^{-1/3} \log(KT^2/\delta)$ , given that  $\mathcal{E} \subset \mathcal{E}_1$ , it follows that  $k^* \in K^\diamond$ .

We now notice that for each  $k \in K^\diamond$  we have that  $\mathcal{Q}_{k, HK} > 32T^{-1/3} \log(KT^2/\delta)$  by definition. In the clean event  $\mathcal{E}$ , we have that  $\mathcal{E}_4$  holds, and hence for each  $h \notin \mathcal{K}$  we have that  $\mathcal{Q}_{h, HK} \leq 32T^{-1/3} \log(KT^2/\delta)$ . It follows that, in the clean event  $\mathcal{E}$ ,  $k \in K^\diamond$  implies  $k \in \mathcal{K}$ , i.e.,  $K^\diamond \subset \mathcal{K}$ .

Now, we recall that Lemma 3 and Lemma 4 imply that, under the event  $\mathcal{E}$ , for all  $t > HK$  and  $k \in \mathcal{K}$ :

$$g(p_k) \leq UCB_{t,k} \leq g(p_k) + \eta_{k,t}, \quad (5)$$

where  $\eta_{k,t} := \tilde{C} \log\left(\frac{T}{\delta}\right) \left(\frac{1}{T^{1/3}} + \frac{1}{\sqrt{\mathcal{T}_{k,t}}}\right)$  and  $\tilde{C} > 0$  is a universal constant.

If, for every  $p \in [0, 1]$ , we define the quantity

$$\Delta_p := g(p_{k^*}) - g(p),$$

given that, for each  $t > HK$ , if  $k_t \in K^\diamond$  is the index of  $p_k = P_t$ , we have

$$g(p_{k^*}) = \max_{k \in K^\diamond} g(p_k) \leq \max_{k \in K^\diamond} UCB_{k,t} = UCB_{k_t,t} \leq g(P_t) + \eta_{k_t,t},$$

we also have

$$\Delta_{P_t} \leq \eta_{k_t,t}.$$

In addition, by Lemma 1 and the fact that the instantaneous regret is upper bounded by 1, we have:

$$\mathcal{R}_T \leq HK + \frac{LT}{K} + \sum_{t=HK+1}^T \Delta_{P_t}.$$

Now, we have

$$\begin{aligned} \sum_{t=HK+1}^T \Delta_{P_t} &= \sum_{k \in K^\diamond} \sum_{t=HK+1}^T \Delta_{P_t} \mathbb{I}\{P_t = p_k\} \\ &\leq \sum_{k \in K^\diamond} \sum_{t=HK+1}^T \eta_{k,t} \mathbb{I}\{P_t = p_k\} \\ &\leq \sum_{k \in K^\diamond} \sum_{t=HK+1}^T \left( \tilde{C} \log\left(\frac{T}{\delta}\right) \left(\frac{1}{T^{1/3}} + \frac{1}{\sqrt{\mathcal{T}_{k,t}}}\right) \right) \mathbb{I}\{P_t = p_k\} \\ &\leq \tilde{C} \log\left(\frac{T}{\delta}\right) \sum_{k \in K^\diamond} \sum_{t=HK+1}^T \left(\frac{1}{T^{1/3}} + \frac{1}{\sqrt{\mathcal{T}_{k,t}}}\right) \mathbb{I}\{P_t = p_k\} \\ &\leq \tilde{C} \log\left(\frac{T}{\delta}\right) \left( \sum_{k \in K^\diamond} \sum_{t=HK+1}^T \frac{\mathbb{I}\{P_t = p_k\}}{\sqrt{\mathcal{T}_{k,t}}} + T^{2/3} \right) \\ &\leq \tilde{C} \log\left(\frac{T}{\delta}\right) \left( \sum_{k \in K^\diamond} 2\sqrt{\mathcal{T}_{k,T}} + T^{2/3} \right) \\ &\leq \tilde{C} \log\left(\frac{T}{\delta}\right) \left( 2\sqrt{KT} + T^{2/3} \right) = 4\tilde{C} \log\left(\frac{T}{\delta}\right) T^{2/3}, \end{aligned}$$

where the last inequality is Jensen's inequality. Hence

$$\mathbb{E}[\mathcal{R}_T \mathbb{I}_{\mathcal{E}}] \leq \mathbb{E} \left[ 4\tilde{C} \log\left(\frac{T}{\delta}\right) T^{2/3} \mathbb{I}_{\mathcal{E}} \right] \leq 4\tilde{C} \log\left(\frac{T}{\delta}\right) T^{2/3} = \tilde{\mathcal{O}}(T^{2/3}),$$

concluding the proof.  $\square$
